# Supplementary material for: Complete response to PD-1 blockade following EBV-specific T-cell therapy in metastatic nasopharyngeal carcinoma
Source: PubMed Central journal article supplement (PMC7979738; doi:10.1038/s41698-021-00162-7), 2021-03-19

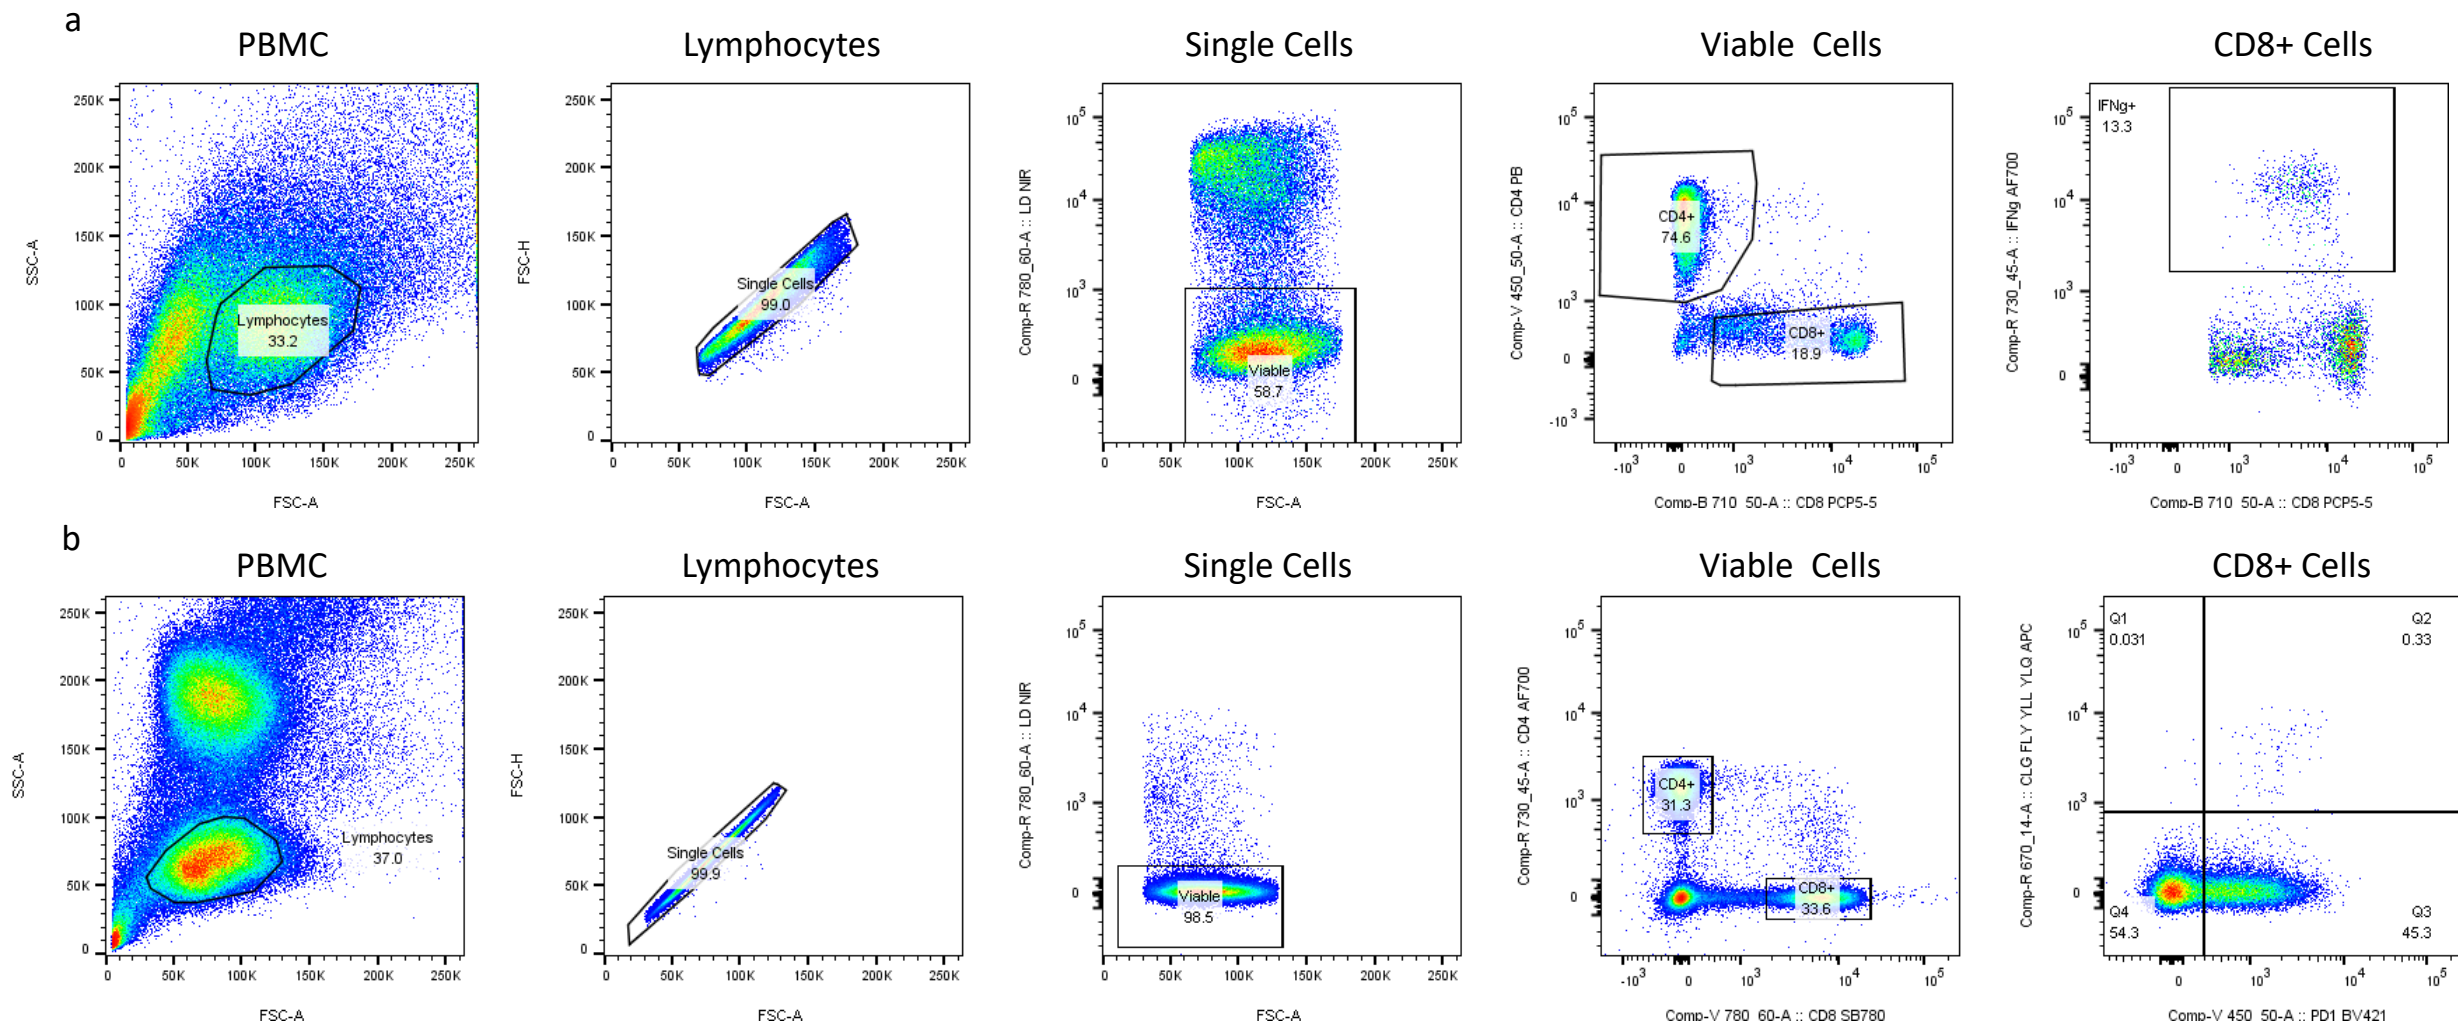

Supplement: 41698_2021_162_MOESM1_ESM.pdf [file 41698_2021_162_MOESM1_ESM.pdf]
