# Supplementary material for: Complete response to PD-1 blockade following EBV-specific T-cell therapy in metastatic nasopharyngeal carcinoma
Source: PubMed Central journal article supplement (PMC7979738; doi:10.1038/s41698-021-00162-7), 2021-03-19
Supplement: 41698_2021_162_MOESM2_ESM.pdf [file 41698_2021_162_MOESM2_ESM.pdf]

## Reporting Summary

Nature Research wishes to improve the reproducibility of the work that we publish. This form provides structure for consistency and transparency in reporting. For further information on Nature Research policies, see our [Editorial Policies](#) and the [Editorial Policy Checklist](#).

### Statistics

For all statistical analyses, confirm that the following items are present in the figure legend, table legend, main text, or Methods section.

- |                                     |                                                                                                                                                                                                                                                                                     |
|-------------------------------------|-------------------------------------------------------------------------------------------------------------------------------------------------------------------------------------------------------------------------------------------------------------------------------------|
| n/a                                 | Confirmed                                                                                                                                                                                                                                                                           |
| <input checked="" type="checkbox"/> | <input type="checkbox"/> The exact sample size ( $n$ ) for each experimental group/condition, given as a discrete number and unit of measurement                                                                                                                                    |
| <input checked="" type="checkbox"/> | <input type="checkbox"/> A statement on whether measurements were taken from distinct samples or whether the same sample was measured repeatedly                                                                                                                                    |
| <input checked="" type="checkbox"/> | <input type="checkbox"/> The statistical test(s) used AND whether they are one- or two-sided<br><i>Only common tests should be described solely by name; describe more complex techniques in the Methods section.</i>                                                               |
| <input checked="" type="checkbox"/> | <input type="checkbox"/> A description of all covariates tested                                                                                                                                                                                                                     |
| <input checked="" type="checkbox"/> | <input type="checkbox"/> A description of any assumptions or corrections, such as tests of normality and adjustment for multiple comparisons                                                                                                                                        |
| <input checked="" type="checkbox"/> | <input type="checkbox"/> A full description of the statistical parameters including central tendency (e.g. means) or other basic estimates (e.g. regression coefficient) AND variation (e.g. standard deviation) or associated estimates of uncertainty (e.g. confidence intervals) |
| <input checked="" type="checkbox"/> | <input type="checkbox"/> For null hypothesis testing, the test statistic (e.g. $F$ , $t$ , $r$ ) with confidence intervals, effect sizes, degrees of freedom and $P$ value noted<br><i>Give <math>P</math> values as exact values whenever suitable.</i>                            |
| <input checked="" type="checkbox"/> | <input type="checkbox"/> For Bayesian analysis, information on the choice of priors and Markov chain Monte Carlo settings                                                                                                                                                           |
| <input checked="" type="checkbox"/> | <input type="checkbox"/> For hierarchical and complex designs, identification of the appropriate level for tests and full reporting of outcomes                                                                                                                                     |
| <input checked="" type="checkbox"/> | <input type="checkbox"/> Estimates of effect sizes (e.g. Cohen's $d$ , Pearson's $r$ ), indicating how they were calculated                                                                                                                                                         |

*Our web collection on [statistics for biologists](#) contains articles on many of the points above.*

### Software and code

Policy information about [availability of computer code](#)

Data collection

Data analysis

For manuscripts utilizing custom algorithms or software that are central to the research but not yet described in published literature, software must be made available to editors and reviewers. We strongly encourage code deposition in a community repository (e.g. GitHub). See the Nature Research [guidelines for submitting code & software](#) for further information.

### Data

Policy information about [availability of data](#)

All manuscripts must include a [data availability statement](#). This statement should provide the following information, where applicable:

- Accession codes, unique identifiers, or web links for publicly available datasets
- A list of figures that have associated raw data
- A description of any restrictions on data availability

## Field-specific reporting

Please select the one below that is the best fit for your research. If you are not sure, read the appropriate sections before making your selection.

Life sciences       Behavioural & social sciences       Ecological, evolutionary & environmental sciences

For a reference copy of the document with all sections, see [nature.com/documents/nr-reporting-summary-flat.pdf](https://www.nature.com/documents/nr-reporting-summary-flat.pdf)

## Life sciences study design

All studies must disclose on these points even when the disclosure is negative.

|                 |                                                                                              |
|-----------------|----------------------------------------------------------------------------------------------|
| Sample size     | <input type="text" value="This is a case report and describes results from a single donor"/> |
| Data exclusions | <input type="text" value="No data was excluded from the analysis"/>                          |
| Replication     | <input type="text" value="This is a single patient case report"/>                            |
| Randomization   | <input type="text" value="Not applicable due to report of a single donor"/>                  |
| Blinding        | <input type="text" value="Not applicable"/>                                                  |

## Reporting for specific materials, systems and methods

We require information from authors about some types of materials, experimental systems and methods used in many studies. Here, indicate whether each material, system or method listed is relevant to your study. If you are not sure if a list item applies to your research, read the appropriate section before selecting a response.

### Materials & experimental systems

| n/a                                 | Involvement in the study                                        |
|-------------------------------------|-----------------------------------------------------------------|
| <input type="checkbox"/>            | <input checked="" type="checkbox"/> Antibodies                  |
| <input checked="" type="checkbox"/> | <input type="checkbox"/> Eukaryotic cell lines                  |
| <input checked="" type="checkbox"/> | <input type="checkbox"/> Palaeontology and archaeology          |
| <input checked="" type="checkbox"/> | <input type="checkbox"/> Animals and other organisms            |
| <input type="checkbox"/>            | <input checked="" type="checkbox"/> Human research participants |
| <input type="checkbox"/>            | <input checked="" type="checkbox"/> Clinical data               |
| <input checked="" type="checkbox"/> | <input type="checkbox"/> Dual use research of concern           |

### Methods

| n/a                                 | Involvement in the study                           |
|-------------------------------------|----------------------------------------------------|
| <input checked="" type="checkbox"/> | <input type="checkbox"/> ChIP-seq                  |
| <input type="checkbox"/>            | <input checked="" type="checkbox"/> Flow cytometry |
| <input checked="" type="checkbox"/> | <input type="checkbox"/> MRI-based neuroimaging    |

## Antibodies

|                 |                                                                                                                                                                                                                                                                                                                                                                                                                                                                                               |
|-----------------|-----------------------------------------------------------------------------------------------------------------------------------------------------------------------------------------------------------------------------------------------------------------------------------------------------------------------------------------------------------------------------------------------------------------------------------------------------------------------------------------------|
| Antibodies used | <input type="text" value="Antibodies used in this study: anti-CD8-PerCP-Cy5.5 (clone RPA-T8, eBioscience), anti-CD4-Pacific Blue (clones RPA-T4, BD Biosciences), anti-IFN-g-Alexa Fluor 700 (clone B27, BD Biosciences), anti-CD8-SB780 (clone RPA-T8, eBioscience), anti-CD4-AF700 (clone RPA-T4, BD Biosciences) anti-CD95-PECy7 (clone CX2, Biolegend, San Diego, USA), anti-PD-1-BV421 (clone EH12.1, BD Biosciences), anti-CD4-FITC (clone RPA-T4, BD Biosciences, New Jersey, USA)."/> |
| Validation      | <input type="text" value="All antibodies used in this study have been previously validated in the laboratory. All antibodies are tested and titrated on human PBMC samples as per the manufacturer's recommendations."/>                                                                                                                                                                                                                                                                      |

## Human research participants

Policy information about [studies involving human research participants](#)

|                            |                                                                                                                                                                                                                      |
|----------------------------|----------------------------------------------------------------------------------------------------------------------------------------------------------------------------------------------------------------------|
| Population characteristics | <input type="text" value="The manuscript describes a single case report of a patient."/>                                                                                                                             |
| Recruitment                | <input type="text" value="The patient was recruited as part of a clinical trial and were selected based on eligibility criteria. See ACTRN12613000866707 for criteria. We are no aware of any bias in recruitment"/> |
| Ethics oversight           | <input type="text" value="QIMR Berghofer Medical Research Institute and Princess Alexandra Hospital."/>                                                                                                              |

Note that full information on the approval of the study protocol must also be provided in the manuscript.

## Clinical data

Policy information about [clinical studies](#)

All manuscripts should comply with the ICMJE [guidelines for publication of clinical research](#) and a completed [CONSORT checklist](#) must be included with all submissions.

|                             |                                                                                                                                                     |
|-----------------------------|-----------------------------------------------------------------------------------------------------------------------------------------------------|
| Clinical trial registration | ACTRN12613000866707                                                                                                                                 |
| Study protocol              | The study protocol can share on requested via the corresponding author                                                                              |
| Data collection             | Data were collected at Princes Alexandra Hospital and QIMR-Berghofer. Data was collected from the middle of 2017 until present day                  |
| Outcomes                    | Although this is a case report, the clinical trial has outcome measures which are described in the approved protocol, including safety and efficacy |

## Flow Cytometry

### Plots

Confirm that:

- The axis labels state the marker and fluorochrome used (e.g. CD4-FITC).
- The axis scales are clearly visible. Include numbers along axes only for bottom left plot of group (a 'group' is an analysis of identical markers).
- All plots are contour plots with outliers or pseudocolor plots.
- A numerical value for number of cells or percentage (with statistics) is provided.

### Methodology

|                           |                                                                                                                                                                                                                                                                                                                                                                                                                                                                                                                                                          |
|---------------------------|----------------------------------------------------------------------------------------------------------------------------------------------------------------------------------------------------------------------------------------------------------------------------------------------------------------------------------------------------------------------------------------------------------------------------------------------------------------------------------------------------------------------------------------------------------|
| Sample preparation        | All biological material from the patient was prepared from the peripheral blood of the patient at the indicated timepoints. Plasma for EBV DNA load was isolated following centrifugation of whole blood and stored at -70C. Peripheral blood mononuclear cells (PBMC) were prepared from whole blood using a FICOLL-Paque density gradient and cryopreserved in 10% DMSO in liquid nitrogen until required for analysis. PBMC were thawed rapidly from cryopreservation, then washed to remove DMSO and used for flow cytometric or functional analysis |
| Instrument                | Samples were acquired using a BD LSRFortessa with FACSDiva software (BD Biosciences, Franklin Lakes, New Jersey, USA).                                                                                                                                                                                                                                                                                                                                                                                                                                   |
| Software                  | Post-acquisition cytokine analysis was performed using FCAP array (BD Biosciences) software. Graphs were compiled using GraphPad Prism. TCR sequencing was performed by Adaptive Biotechnologies and data analysis was performed using the immunoSEQ Analyzer                                                                                                                                                                                                                                                                                            |
| Cell population abundance | Acquisition for flow cytometry was set to acquire a minimum 50,000 viable lymphocytes for cultured T cells and 100,000 viable cells for PBMC. Antigen-specific cell abundance for ICS and MHC-Multimer analysis ranged from 0.06% to 26% of CD8+ T cells.                                                                                                                                                                                                                                                                                                |
| Gating strategy           | All gating strategies commenced with FSC-A vs SSC-A to define lymphocytes, followed by a single cell gate FSC-H vs FSC-A to exclude doublets. Non-viable cells were then excluded using Live-Dead NIR vs FSC-A gate. CD4 vs CD8 gate was next used to separate CD8+ cells (CD8+CD4-). For ICS analysis cells, IFN $\gamma$ production was then assessed in CD8+ T cells using IFN $\gamma$ vs CD8 gate. MHC-Multimer vs PD-1 on CD8+ T cells was used for frequency and checkpoint analysis                                                              |

- Tick this box to confirm that a figure exemplifying the gating strategy is provided in the Supplementary Information.
